# Supplementary material for: A cuboctahedral platinum (Pt79) nanocluster enclosed by well defined facets favours di-sigma adsorption and improves the reaction kinetics for methanol fuel cells
Source: Royal Society of Chemistry journal article supplement (doi:10.1039/c5nr01575h), 2015-01-01
Supplement: c5nr01575h1.pdf [file c5nr01575h1.pdf]

## Supporting information

### **Cuboctahedral Platinum (Pt<sub>79</sub>) Nanocluster Enclosed by Well Defined Facets Favours the Di-sigma Adsorption and Improves the Reaction Kinetics for Methanol Fuel Cell**

Arup Mahata,<sup>†</sup> Indrani Choudhuri,<sup>†</sup> Biswarup Pathak,<sup>†,#,\*</sup>

<sup>†</sup>Discipline of Chemistry, School of Basic Sciences, Indian Institute of Technology (IIT) Indore, Indore, M.P., India

<sup>#</sup>Center for Material Science and Engineering, Indian Institute of Technology (IIT) Indore, Indore, M. P., India

Email: [biswarup@iiti.ac.in](mailto:biswarup@iiti.ac.in)

#### **Contents**

**Table S1:** Adsorption energy and key parameters of the different intermediates

**Scheme S1:** Gas phase energetic for the complete reaction pathway

**Scheme S2:** The reaction energies and activation barriers for the successive methanol dehydrogenation at different binding sites

**Scheme S3:** Relative energetic for all the reaction intermediates.

**Figure S1:** Reaction energy profile for the first C-H/O-H bond dissociation of methanol

**Figure S2:** Initial state, transition state and final state geometries of the first dehydrogenation step

**Figure S3:** Reaction energy profile for the second C-H/O-H bond dissociation of hydroxymethyl and methoxy

**Figure S4:** Initial state, transition state and final state geometries of the second dehydrogenation step

**Figure S5:** Reaction energy profile for the third C-H/O-H bond dissociation of hydroxymethelene and formaldehyde

**Figure S6:** Initial state, transition state and final state geometries of the third dehydrogenation step

**Figure S7:** Reaction energy profile for the fourth C-H/O-H bond dissociation of hydroxymethylidyne and formyl

**Figure S8:** Initial state, transition state and final state geometries of the fourth dehydrogenation step

**Table S1:** Adsorption energy (eV), adsorption behaviour, relative energy (eV) and key bond lengths (Å) of the possible intermediates. Here (t), (b), and (h) represents the intermediates adsorbed at the top, bridge and three-fold hollow site respectively.

| Species            | Adsorption Energy |           |           | Relative Energy |      |        | Bond length |            |                                                        |
|--------------------|-------------------|-----------|-----------|-----------------|------|--------|-------------|------------|--------------------------------------------------------|
|                    | Edge              |           | Bridge    | Edge            |      | Bridge | Edge        |            | Bridge                                                 |
|                    | *C-               | *O-       |           | *C-             | *O-  |        | Pt-C        | Pt-O       |                                                        |
| CH <sub>3</sub> OH | -0.24 (t)         | -0.38 (t) | -0.19 (d) | 0.19            | 0.00 | 0.18   | 3.24        | 2.52       | Pt-H(C) 2.83<br>Pt-H(O) 2.71<br>Pt-C 3.32<br>Pt-O 3.59 |
| CH <sub>3</sub> O  | -3.61 (t)         | -2.47 (t) | -2.25 (d) | 0.44            | 0.00 | 0.13   | 3.59        | 1.97       | Pt-H 2.09<br>Pt-O 2.01                                 |
| CH <sub>2</sub> OH | -2.76 (t)         | -1.07 (b) | -2.78 (t) | 0.00            | 1.56 | 0.03   | 2.08        | 3.10, 3.70 | Pt-H 2.41<br>Pt-H 2.43<br>Pt-C 2.08                    |
| CHOH               | -3.67 (t)         | -0.25 (t) | -4.86 (d) | 0.15            | 3.18 | 0.00   | 1.89        | 2.73       | Pt-C 2.03<br>Pt-O 2.72                                 |
| CH <sub>2</sub> O  | -0.17 (t)         | -0.55 (t) | -1.94 (d) | 0.37            | 0.10 | 0.00   | 2.67        | 2.18       | Pt-C 2.11<br>Pt-O 2.05                                 |
| CHO                | -3.03 (t)         | -0.60 (t) | -3.47 (d) | 0.00            | 2.38 | 0.08   | 1.96        | 2.25       | Pt-C 2.07<br>Pt-O 2.15                                 |
| COH                | -3.94 (t)         | -0.64 (t) | -5.67 (h) | 1.58            | 4.68 | 0.00   | 1.78        | 2.75       | Pt-C 2.02                                              |
| CO                 | -2.22 (t)         | 0.04 (t)  | -2.29 (h) | 0.14            | 2.04 | 0.00   | 1.94        | 2.51       | Pt-C 2.11                                              |

**Scheme S1:** Gas phase energetic (energy in eV) for the complete methanol dehydrogenation pathway to show the effect of the catalyst.

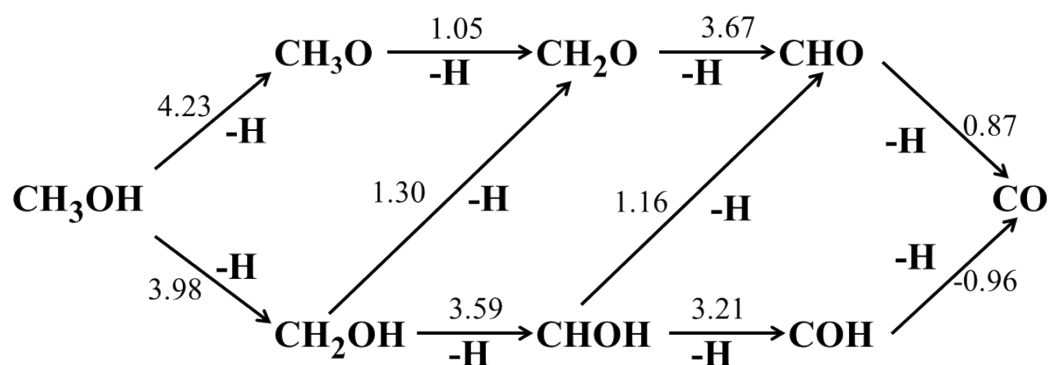

**Scheme S2:** The reaction energies (eV) and activation barriers (eV, values in parenthesis) for the successive methanol dehydrogenation at different binding sites (a) adsorbed through C-atom and (b) O-atom at top edge position and (c) bridge position.[Values in the black colour are without ZPE and entropy correction whereas red colour are including ZPE and entropy correction]

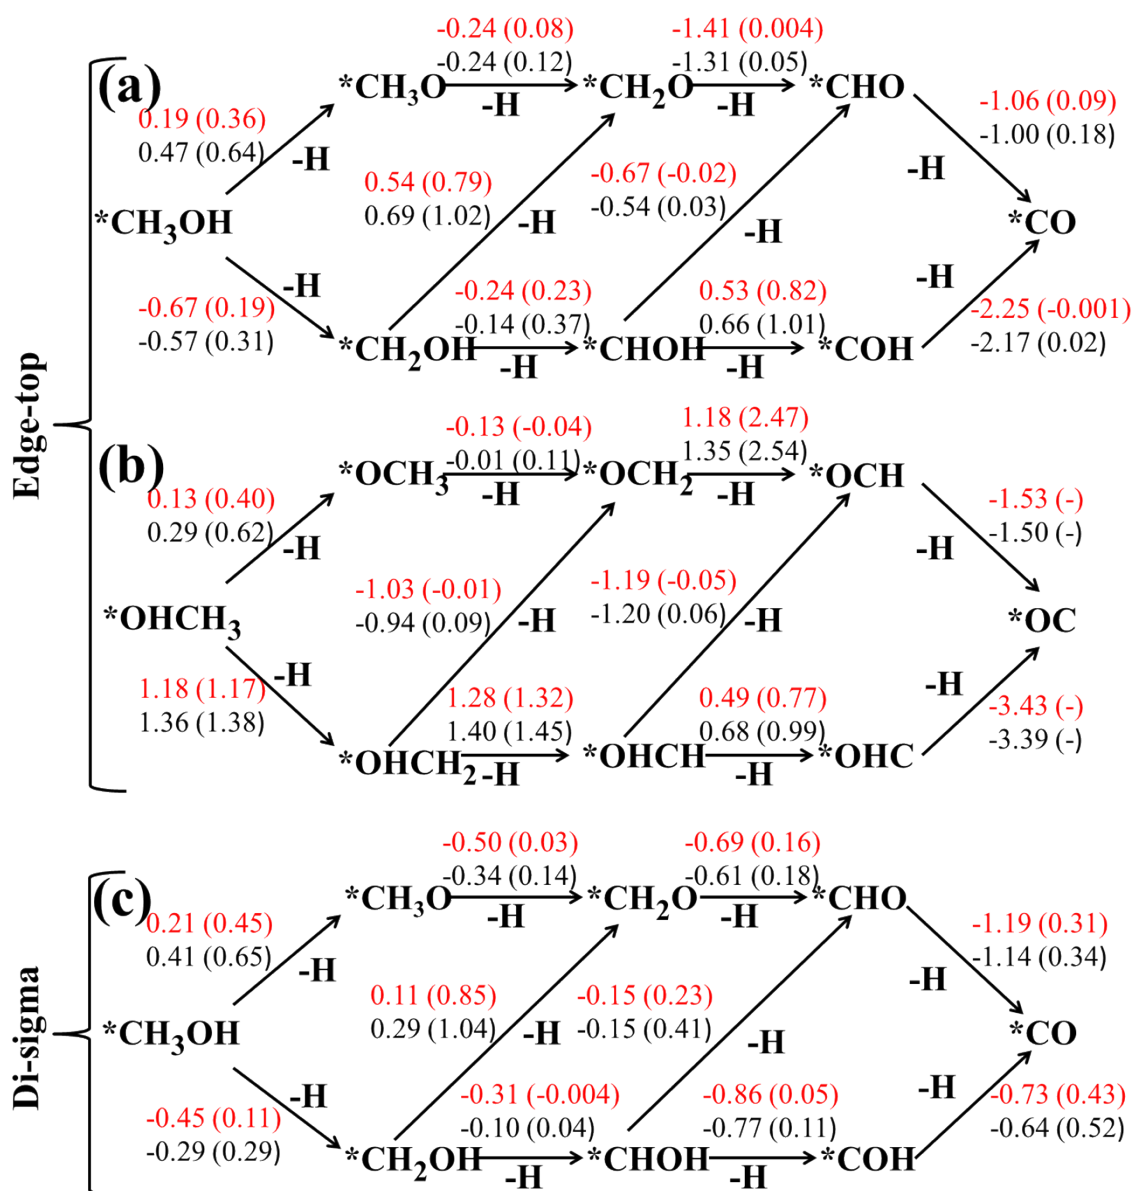

**Scheme S3:** Relative energetic (eV) for all the reaction intermediates.

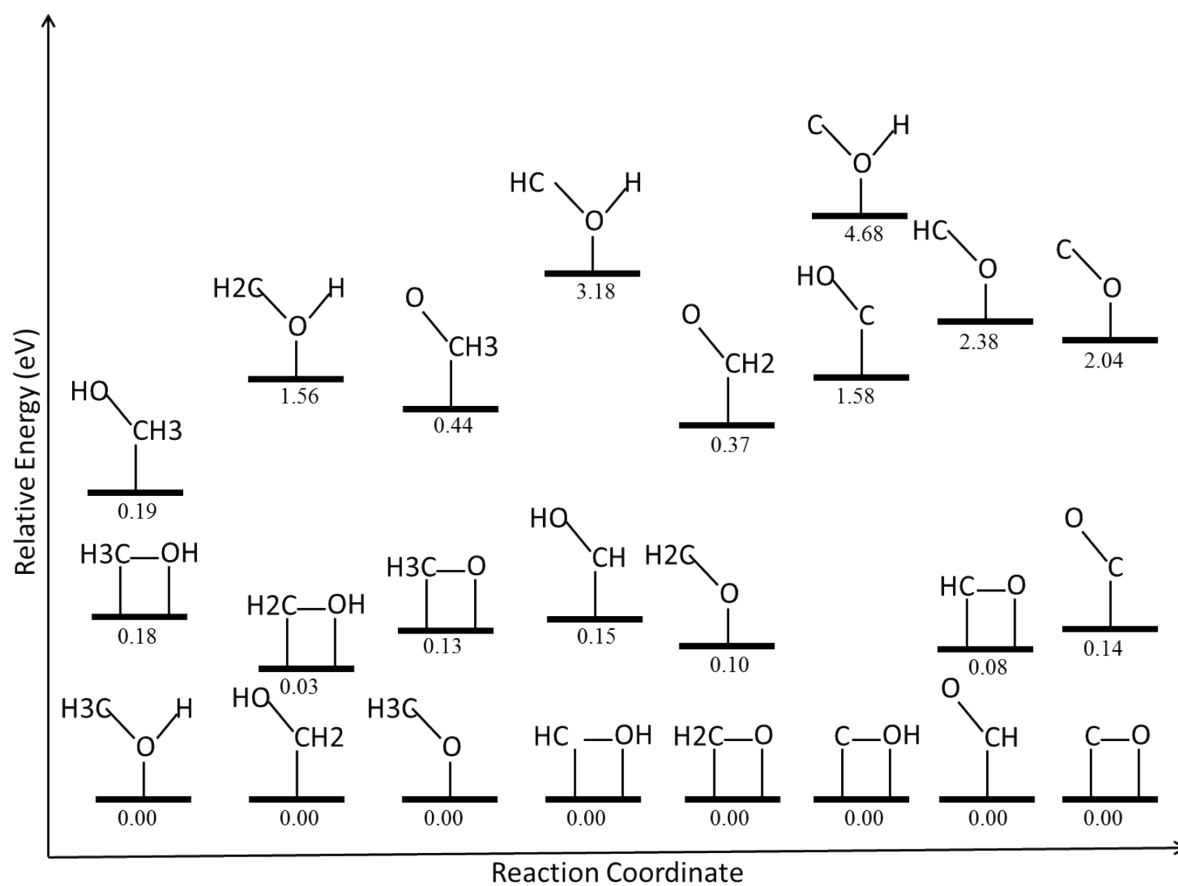

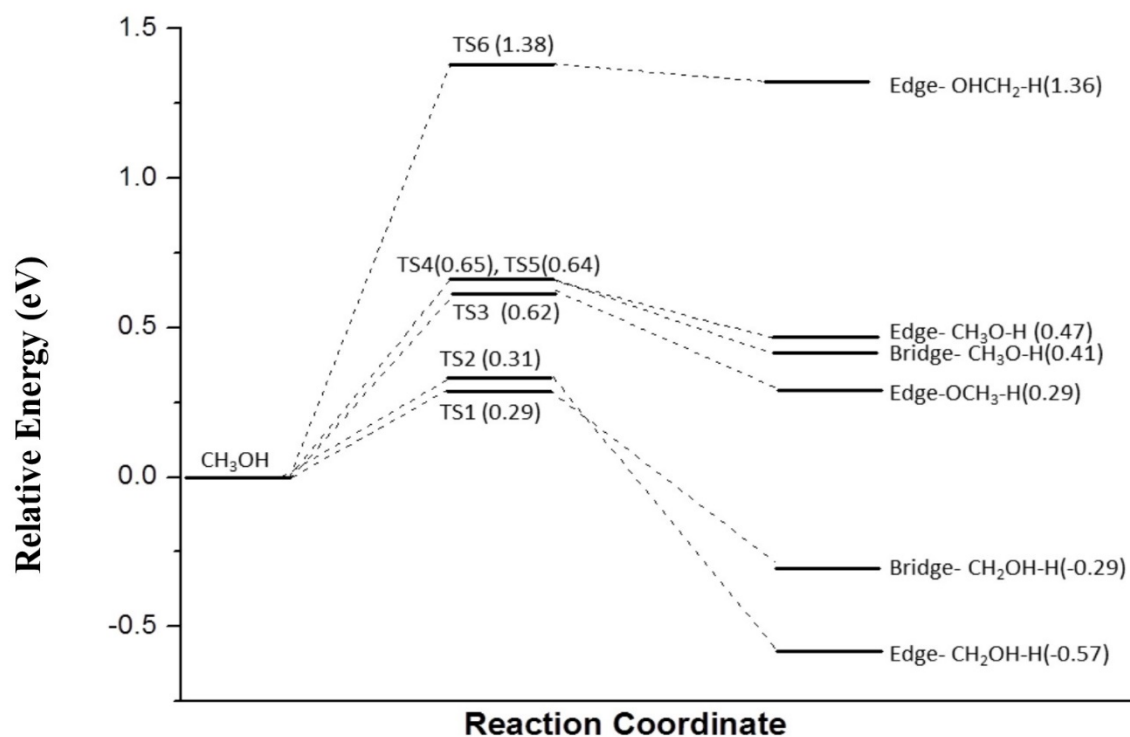

**Figure S1:** Reaction energy profile for the first C-H/O-H bond dissociation of methanol at the different active sites (Edge and bridge) of the nanocluster surface. Here TS means transition state.

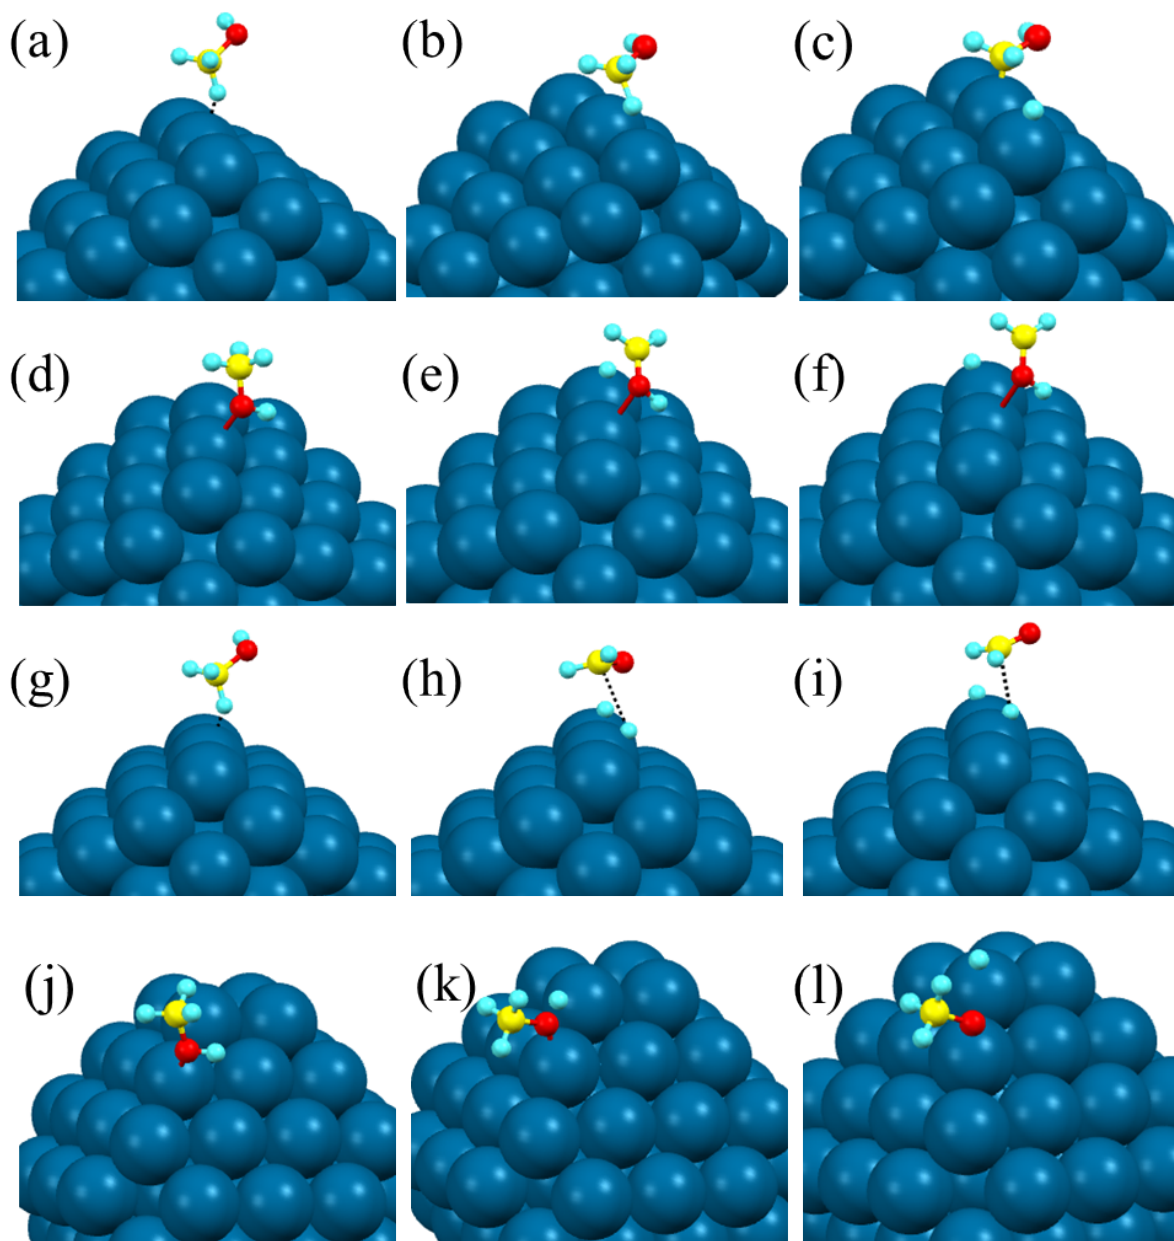

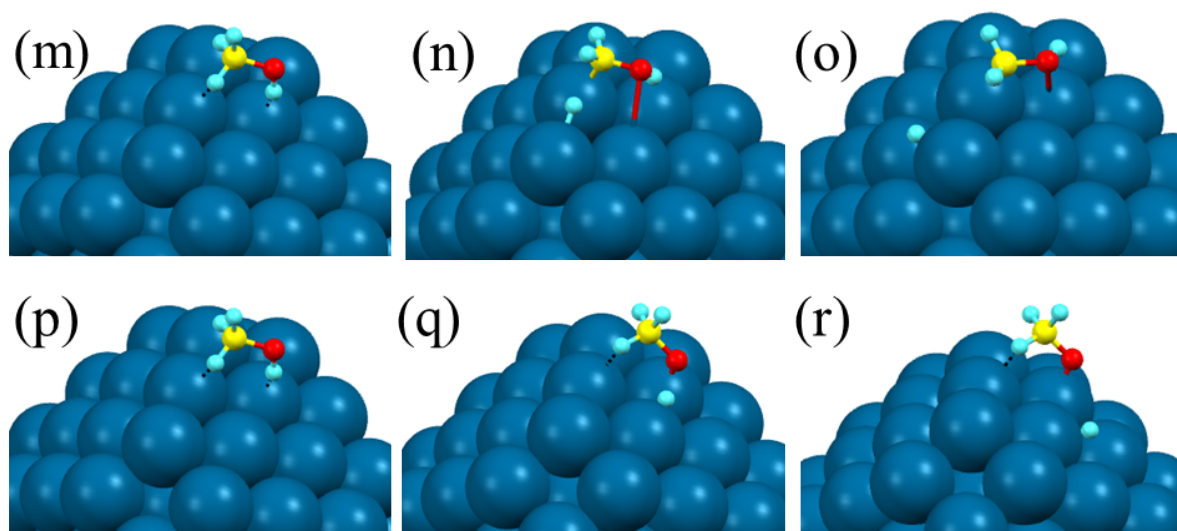

**Figure S2:** First to third columns are the structures of the initial state, transition state and final state. At the edge position, [(a)-(c)]  $\text{CH}_3\text{OH} \rightarrow \text{CH}_2\text{OH-H}$ ; [(d)-(f)]  $\text{OHCH}_3 \rightarrow \text{OHCH}_2\text{-H}$ ; [(g)-(i)]  $\text{CH}_3\text{OH} \rightarrow \text{CH}_3\text{O-H}$ ; [(j)-(l)]  $\text{OHCH}_3 \rightarrow \text{OCH}_3\text{-H}$ , and at the bridge position [(m)-(o)]  $\text{CH}_3\text{OH} \rightarrow \text{CH}_2\text{OH-H}$ ; [(p)-(r)]  $\text{CH}_3\text{OH} \rightarrow \text{CH}_3\text{O-H}$ .

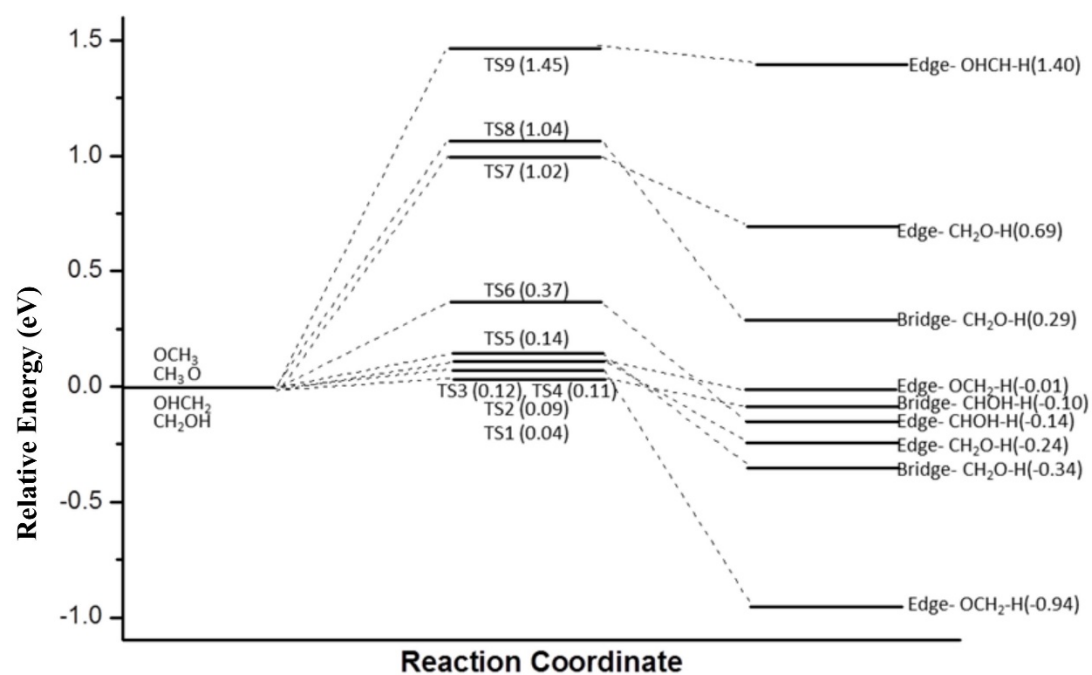

**Figure S3:** Reaction energy profile for the second C-H/O-H bond dissociation of hydroxymethyl and methoxy at the different active sites (Edge and bridge) of the nanocluster surface. Here TS means transition state.

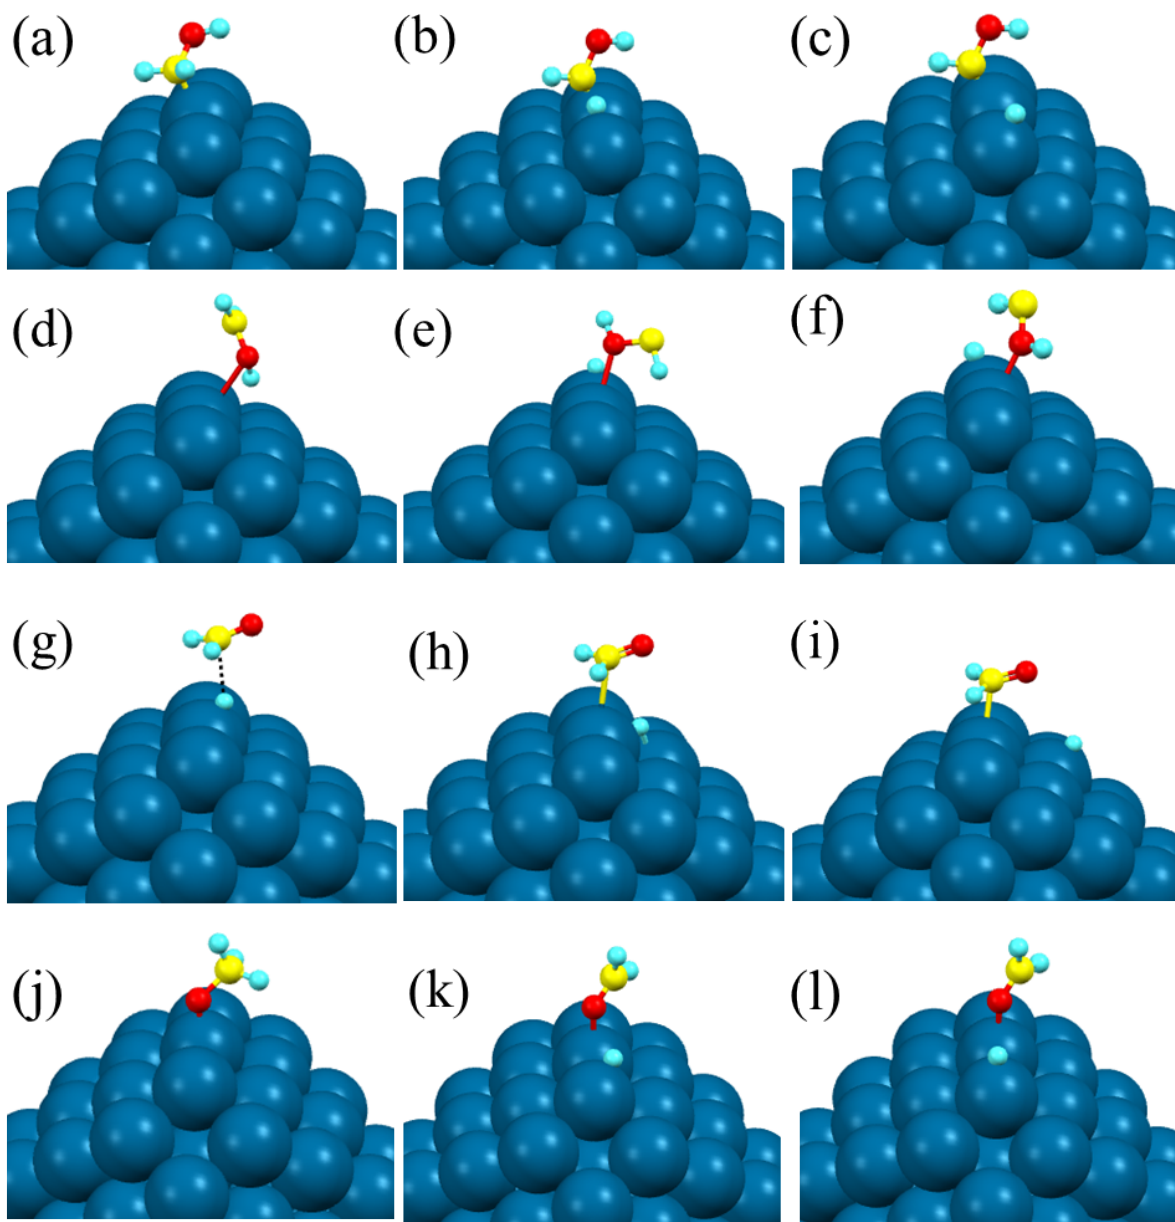

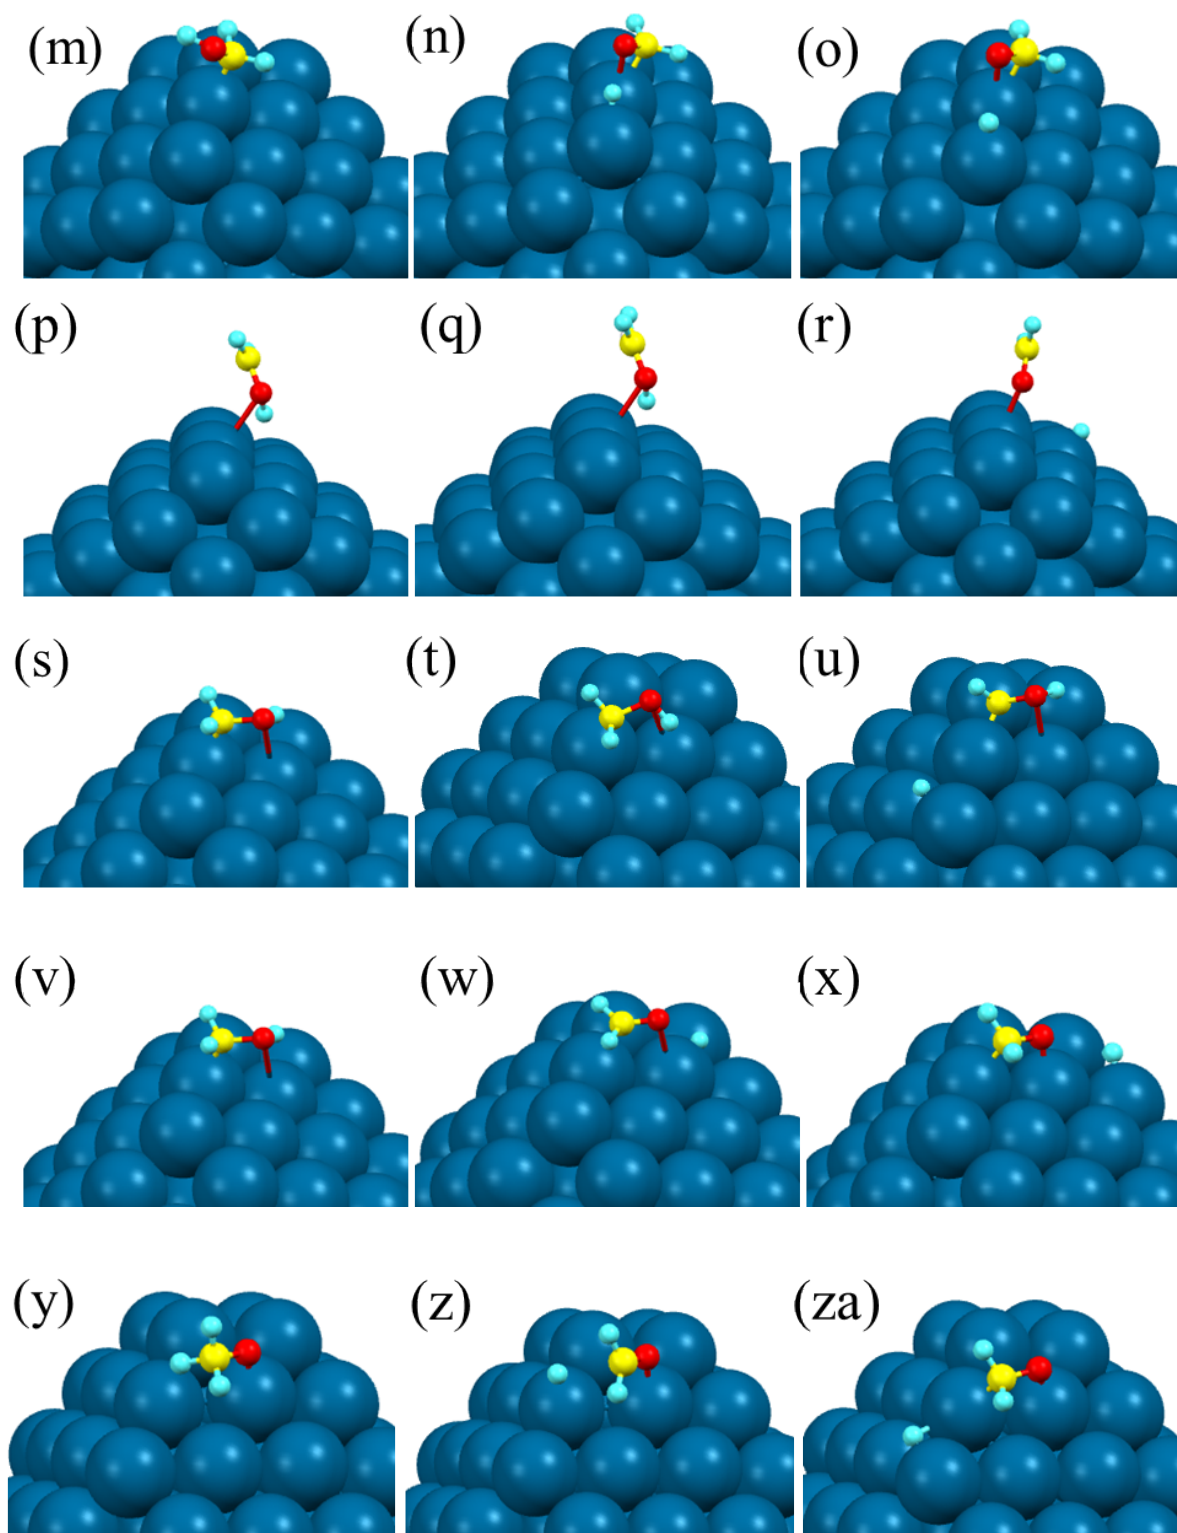

**Figure S4:** First to third columns are the structures of the initial state, transition state and final state. At edge position, [(a)-(c)]  $\text{CH}_2\text{OH} \rightarrow \text{CHOH-H}$ ; [(d)-(f)]  $\text{OHCH}_2 \rightarrow \text{OHCH-H}$ ; [(g)-(i)]  $\text{CH}_3\text{O} \rightarrow \text{CH}_2\text{O-H}$ ; [(j)-(l)]  $\text{OCH}_3 \rightarrow \text{OCH}_2\text{-H}$ ; [(m)-(o)]  $\text{CH}_2\text{OH} \rightarrow \text{CH}_2\text{O-H}$ ; [(p)-(r)]  $\text{OHCH}_2 \rightarrow \text{OCH}_2\text{-H}$ , and at bridge position [(s)-(u)]  $\text{CH}_2\text{OH} \rightarrow \text{CHOH-H}$ ; [(v)-(x)]  $\text{CH}_2\text{OH} \rightarrow \text{CHOH-H}$ ; [(y)-(za)]  $\text{CH}_3\text{O} \rightarrow \text{CH}_2\text{O-H}$ .

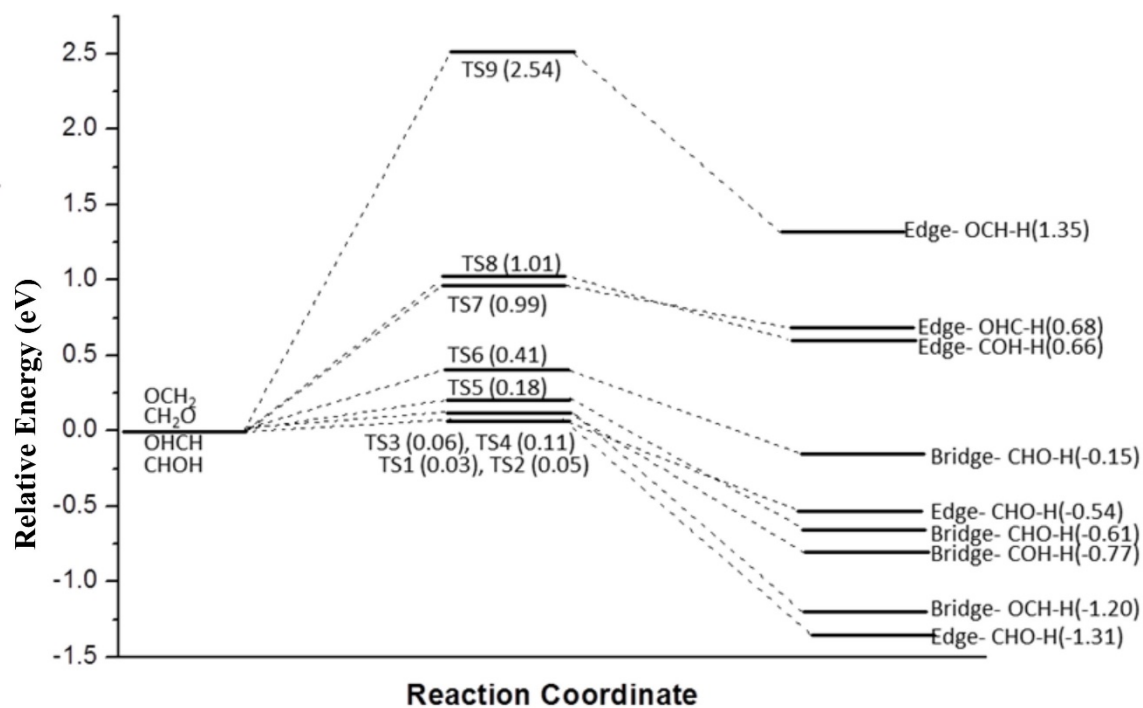

**Figure S5:** Reaction energy profile for the third C-H/O-H bond dissociation of hydroxymethelene and formaldehyde at the different active sites (Edge and bridge) of the nanocluster surface. Here TS means transition state.

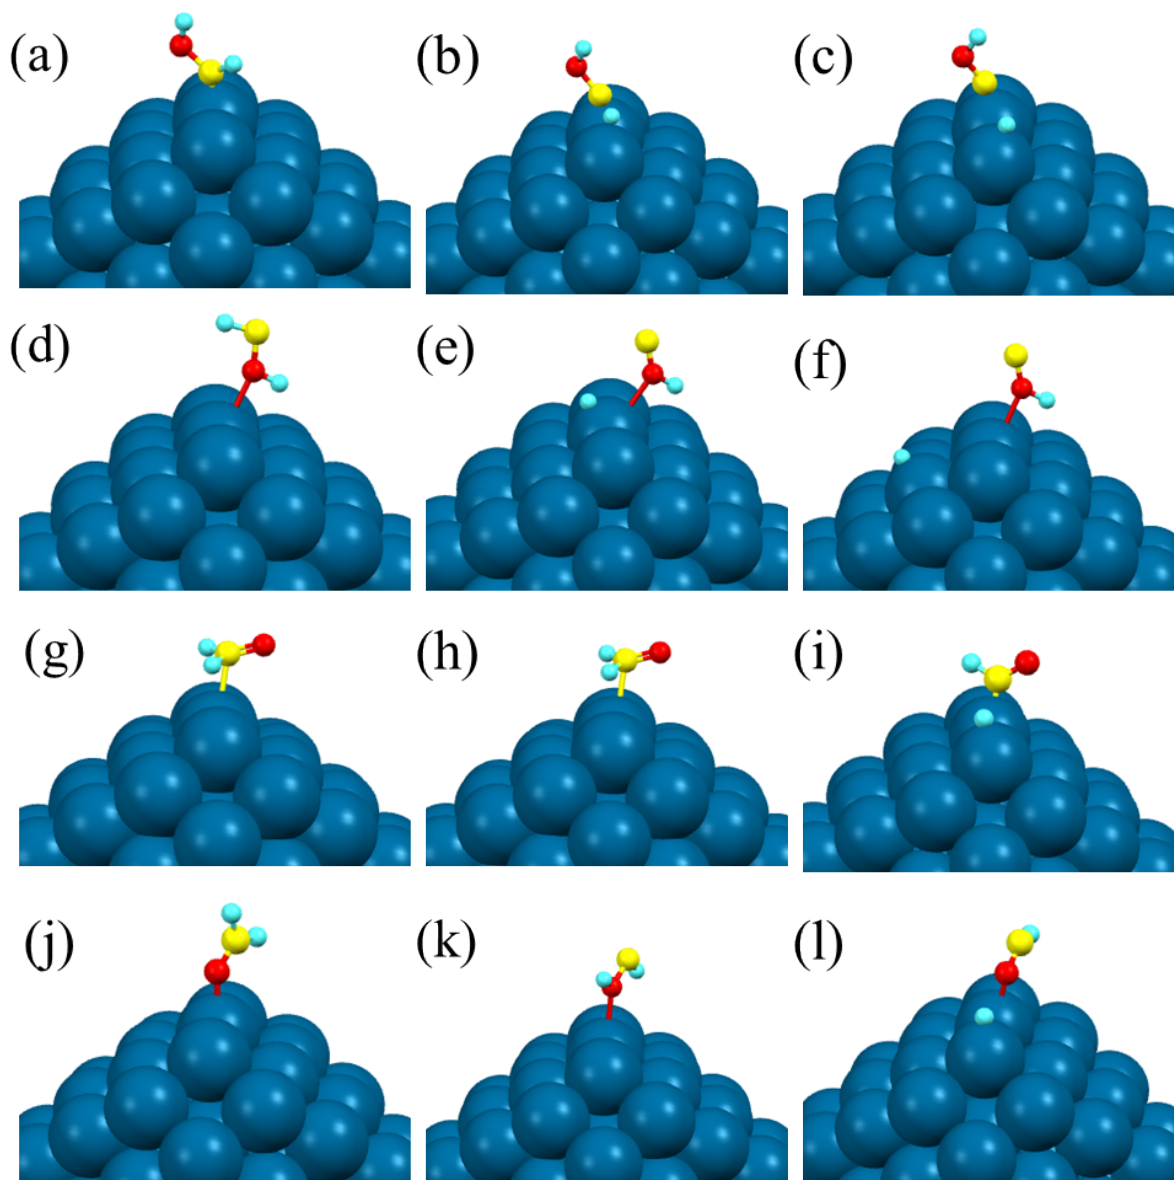

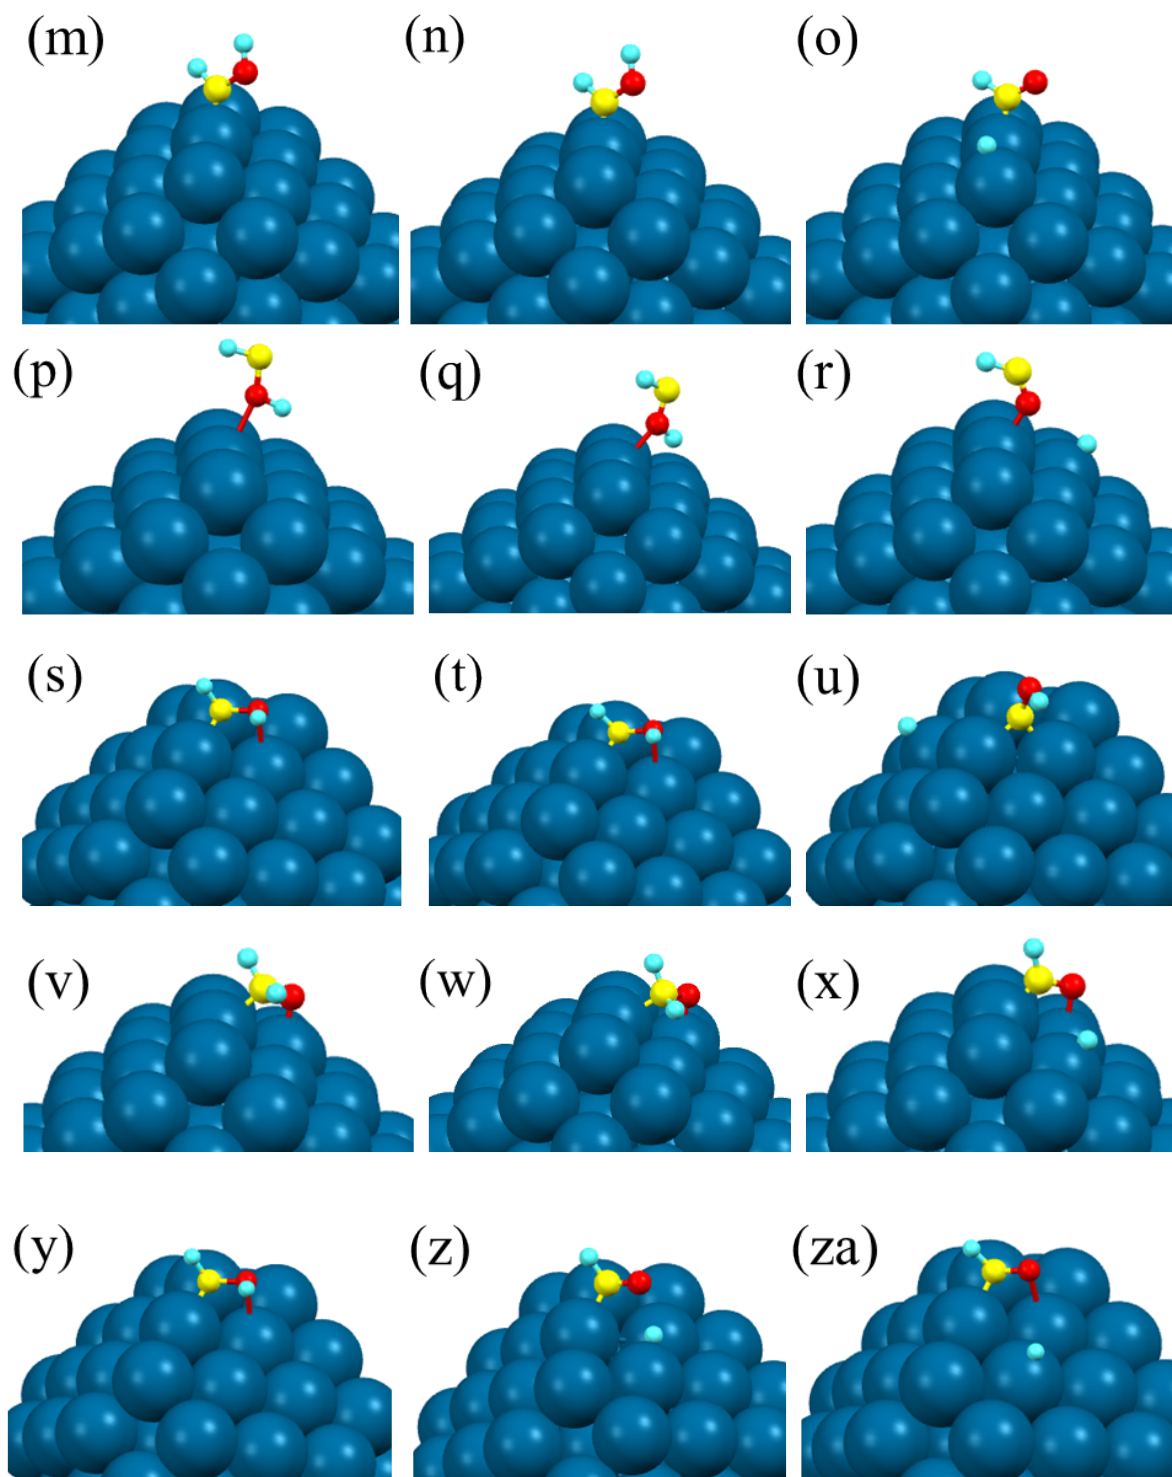

**Figure S6:** First to third columns are the structures of the initial state, transition state and final state. At edge position, [(a)-(c)]  $\text{CHOH} \rightarrow \text{COH-H}$ ; [(d)-(f)]  $\text{OHCH} \rightarrow \text{OHC-H}$ ; [(g)-(i)]  $\text{CH}_2\text{O} \rightarrow \text{CHO-H}$ ; [(j)-(l)]  $\text{OCH}_2 \rightarrow \text{OCH-H}$ ; [(m)-(o)]  $\text{CHOH} \rightarrow \text{CHO-H}$ ; [(p)-(r)]  $\text{OHCH} \rightarrow \text{OCH-H}$ , and at bridge position [(s)-(u)]  $\text{CHOH} \rightarrow \text{COH-H}$ ; [(v)-(x)]  $\text{CH}_2\text{O} \rightarrow \text{CHO-H}$ ; [(y)-(za)]  $\text{CHOH} \rightarrow \text{CHO-H}$ .

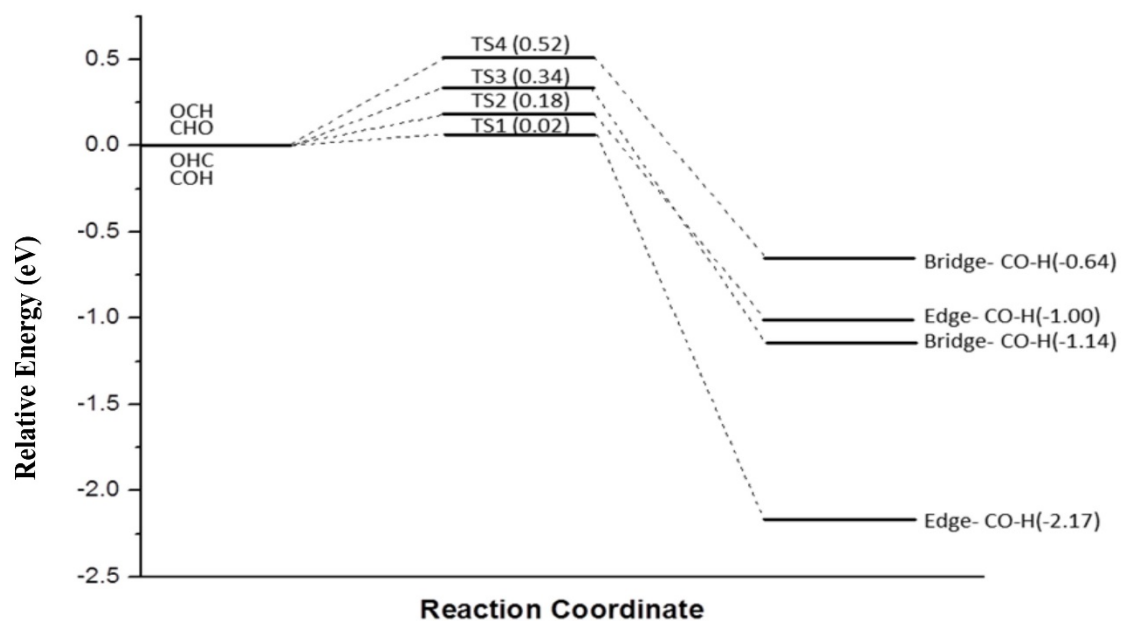

**Figure S7:** Reaction energy profile for the fourth C-H/O-H bond dissociation of hydroxymethylidyne and formyl at the different active sites (Edge and bridge) of the nanocluster surface. Here TS means transition state.

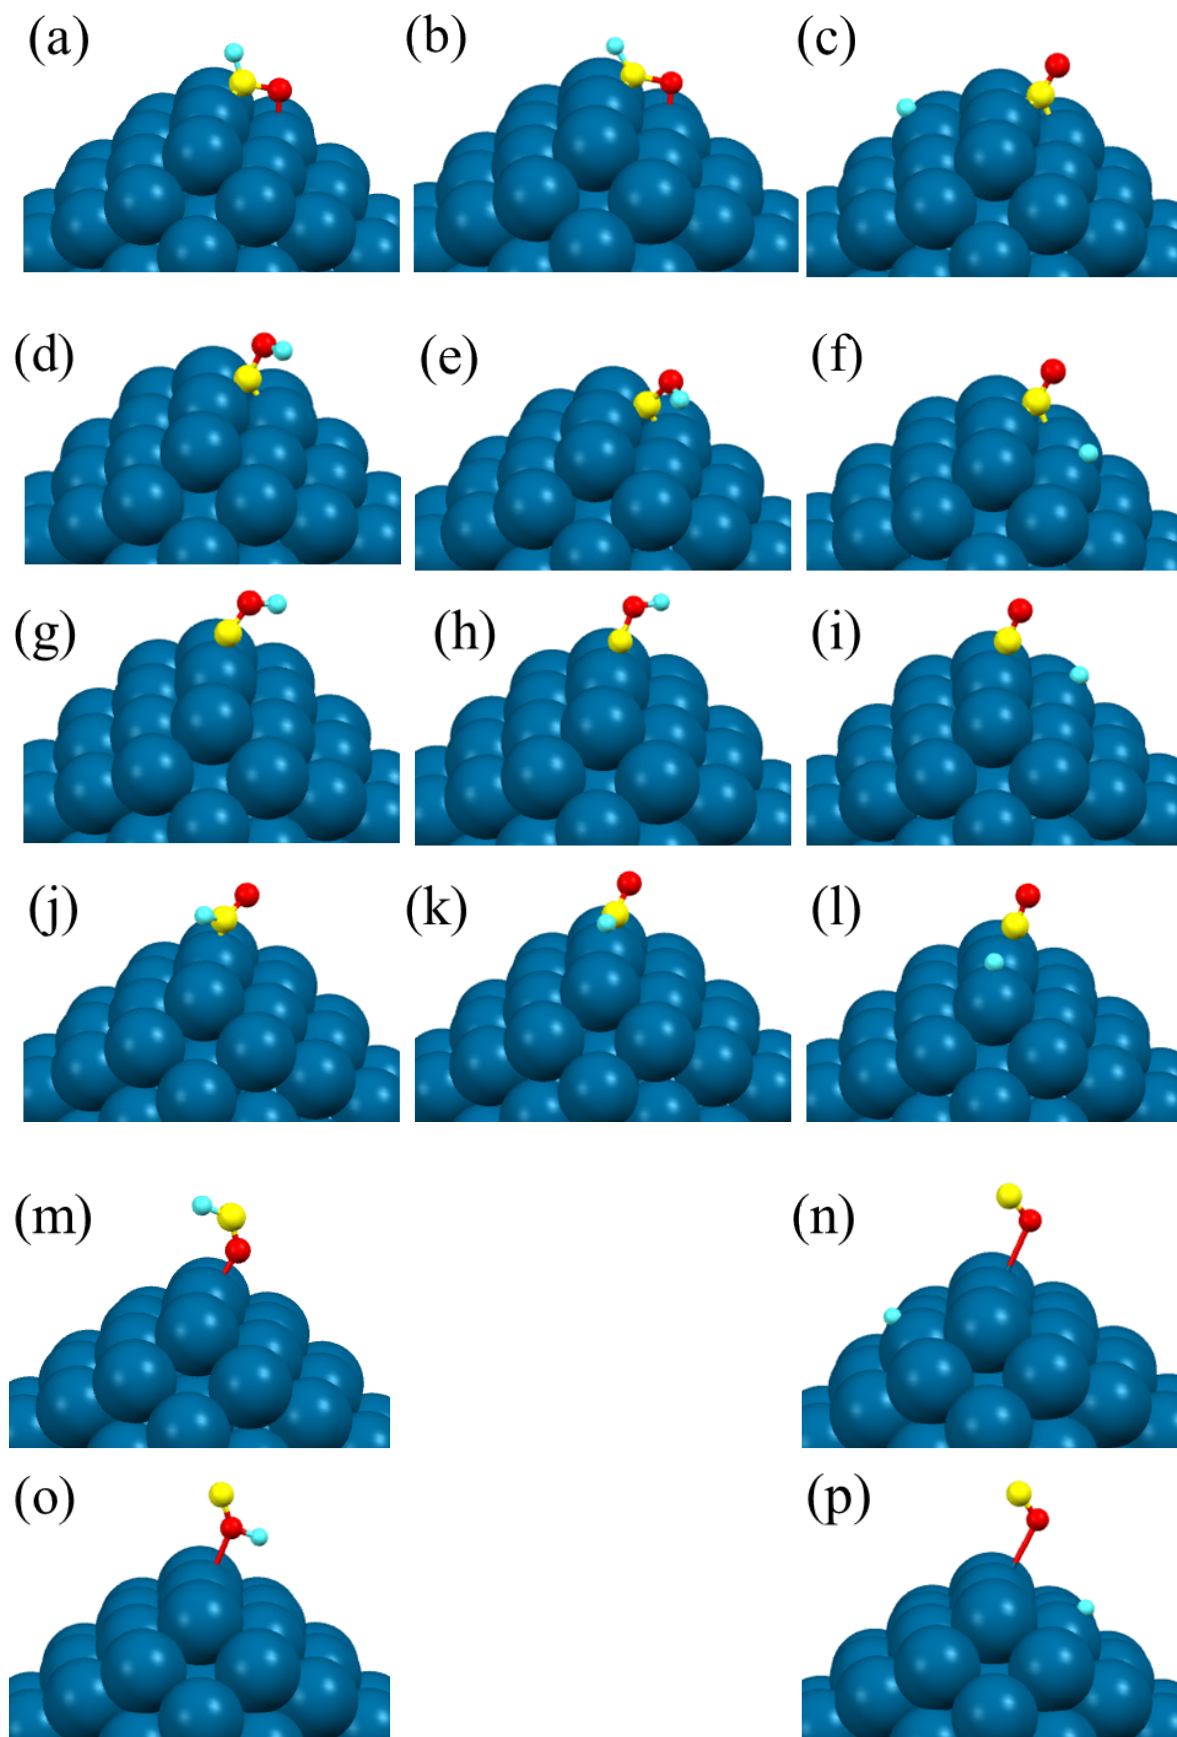

position [(g)-(i)]  $\text{COH} \rightarrow \text{OC-H}$ ; [(j)-(l)]  $\text{CHO} \rightarrow \text{CO-H}$ ; [(m)-(n)]  $\text{OCH} \rightarrow \text{OC-H}$ ; [(o)-(p)]  $\text{OHC} \rightarrow \text{OC-H}$ .
